# Supplementary material for: Plant autophagosomes mature into amphisomes prior to their delivery to the central vacuole
Source: PubMed Central journal article supplement (PMC9584626; doi:10.1083/jcb.202203139), 2022-10-19

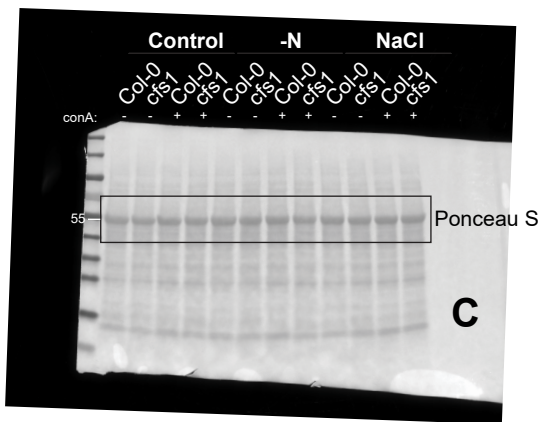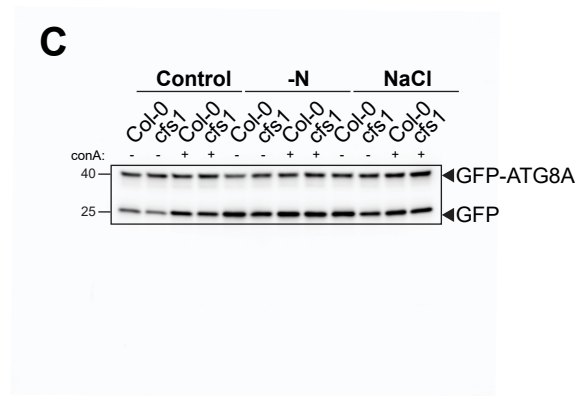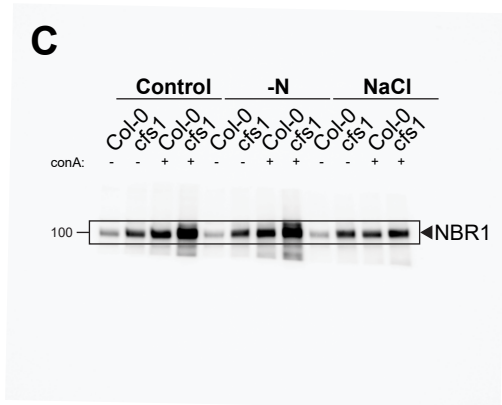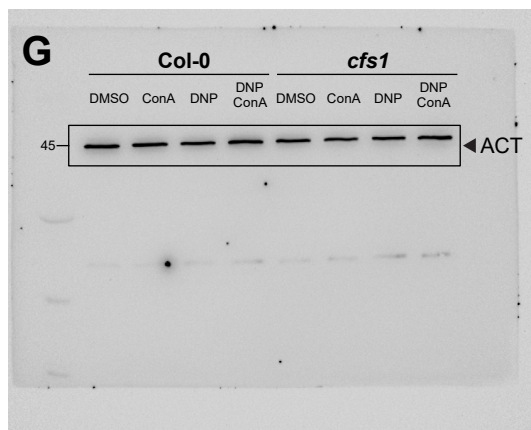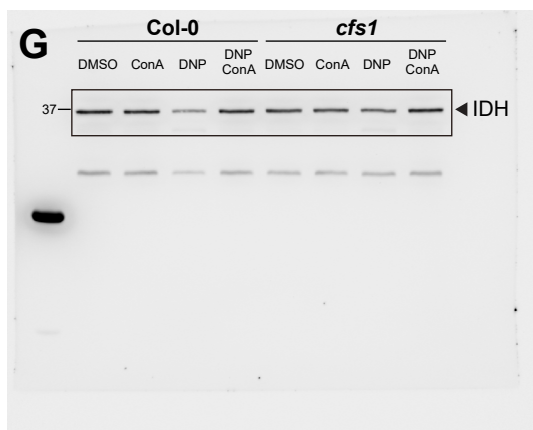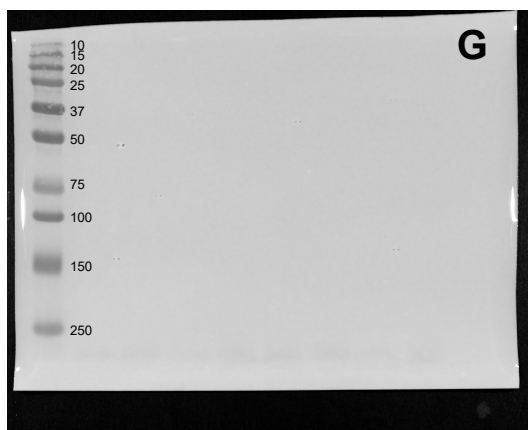

Supplement: JCB_202203139_SourceDataF4.pdf [file JCB_202203139_SourceDataF4.pdf]
